# Supplementary figures and images for: Construction of a Quantitative Acetylomic Tissue Atlas in Rice (Oryza sativa L.)
Source: MDPI journal article supplement (doi:10.3390/molecules23112843), 2018-11-01

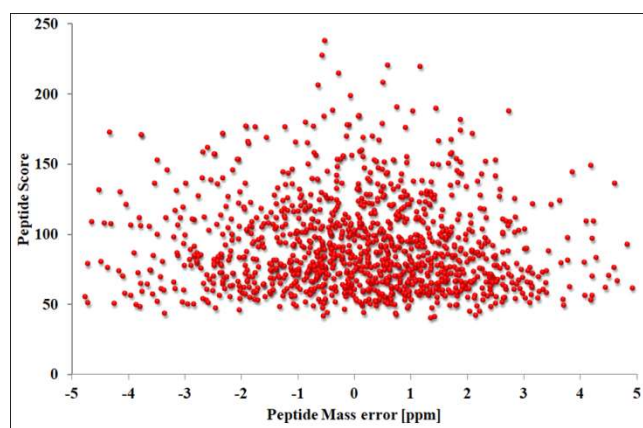

**Figure S1.** The mass errors of the DA proteins identified in this study.

Supplement: s1 [file s1]
